# Supplementary material
Source: publisher figshare collection journal article supplement (https://frontiersin.figshare.com/ndownloader/files/24058154)
Supplement: Supplementary file 1 [file 24058154]

Table S1. Sites surveyed during scientific cruises at the Maldives from 1997 to 2019. Site names follow Godfrey (2006)\* or local usage. Atolls and sites within atolls are ordered alphabetically.

| Atoll | Sites                       | Years                              | Coordinates               |
|-------|-----------------------------|------------------------------------|---------------------------|
| Ari   | Alikoirah                   | 2001                               | 3°56.521' N; 72°52.790' E |
| Ari   | Badhibinhau                 | 2012                               | 3°52.572' N; 72°49.811' E |
| Ari   | Bathalaa Maagaa Kan Beyru   | 2000, 2017, 2019                   | 4°03.267' N; 72°57.425' E |
| Ari   | Bathalaa Maagaa Kan Etheru  | 2001, 2017, 2019                   | 4°03.548' N; 72°56.532' E |
| Ari   | Berucolo Falhu              | 2001                               | 4°02.565' N; 72°44.505' E |
| Ari   | Bodu Thila Kandu            | 2001                               | 4°02.466' N; 72°57.009' E |
| Ari   | Bulhalafushi (Bulhaalhohi)  | 2004                               | 3°44.294' N; 72°43.767' E |
| Ari   | Cristina Thila              | 2009, 2010                         | 4°13.932' N; 72°46.280' E |
| Ari   | Dangethi House Reef         | 2004, 2017                         | 3°36.172' N; 72°56.102' E |
| Ari   | Dangethi House Reef South   | 2004, 2006                         | 3°34.679' N; 72°57.028' E |
| Ari   | Das Kurani Thila            | 2009                               | 4°13.046' N; 72°45.835' E |
| Ari   | Dega Thila                  | 2003, 2004                         | 3°50.663' N; 72°45.028' E |
| Ari   | Dhefahfalhu                 | 2003                               | 4°04.916' N; 72°57.179' E |
| Ari   | Dhinnolhu Finolhu           | 2000                               | 4°08.412' N; 72°43.685' E |
| Ari   | Dhonkadhhaa Hau             | 2012                               | 3°32.564' N; 72°48.327' E |
| Ari   | Dinolugaa Thila Gangehi     | 2009                               | 4°10.182' N; 72°44.900' E |
| Ari   | Eboodhoo                    | 2004                               | 3°48.819' N; 72°45.135' E |
| Ari   | Ellaidhoo Kandu             | 1997, 2016                         | 3°59.881' N; 72°57.525' E |
| Ari   | Faanu Madugau               | 2001, 2003, 2006, 2016, 2017, 2019 | 3°55.527' N; 72°57.478' E |
| Ari   | Faanu Madugau Naghili Thila | 2000, 2003                         | 3°55.831' N; 72°56.462' E |
| Ari   | Farudhiggaa Thila           | 2004                               | 3°55.527' N; 72°57.478' E |
| Ari   | Fish Head                   | 2001, 2004                         | 3°56.537' N; 72°54.732' E |
| Ari   | Fushi Falhu Reef            | 2016                               | 3°56.817' N; 72°57.472' E |
| Ari   | Fussaru Reef                | 2016                               | 4°01.663' N; 72°57.561' E |
| Ari   | Gangehi Falhu               | 2009                               | 4°13.175' N; 72°45.293' E |
| Ari   | Gangehi Kandu               | 2009                               | 4°13.055' N; 72°44.444' E |
| Ari   | Gangehi North               | 2009                               | 4°13.268' N; 72°45.334' E |
| Ari   | Halaveli House Reef         | 1997                               | 4°02.457' N; 72°55.309' E |
| Ari   | Halaveli Wreck              | 1997, 2016                         | 4°03.220' N; 72°54.743' E |
| Ari   | Himendhoo Dhekunu Kandu     | 1997                               | 3°56.641' N; 72°42.330' E |
| Ari   | Kadhohudhoo                 | 2012                               | 4°00.259' N; 72°52.830' E |
| Ari   | Kalhahandhi Huraa           | 1997                               | 3°48.128' N; 72°42.636' E |
| Ari   | Kamdunma Giri               | 2009                               | 4°13.819' N; 72°46.132' E |
| Ari   | Kandualhi Efferata          | 2009                               | 4°13.022' N; 72°44.645' E |
| Ari   | Kandualhi Mifferata         | 2009                               | 4°13.054' N; 72°44.876' E |
| Ari   | Kari Beyru Thila            | 1997                               | 4°05.727' N; 72°56.987' E |
| Ari   | Kubulabhi Beyru             | 2010                               | 3°54.645' N; 72°57.497' E |
| Ari   | Kubulabhi Etheru            | 2017, 2019                         | 3°55.020' N; 72°55.998' E |
| Ari   | Kuda Giri Bodufoludhoo      | 2007, 2010                         | 4°11.154' N; 72°47.196' E |
| Ari   | Kudadhoo Faru               | 2003                               | 3°48.749' N; 72°57.934' E |
| Ari   | Maa Faru                    | 2003                               | 4°06.287' N; 72°42.851' E |
| Ari   | Maalholu Uthuru             | 2000                               | 4°00.265' N; 72°43.463' E |
| Ari   | Maalholu Uthuru Kandu       | 2000                               | 4°00.289' N; 72°42.589' E |
| Ari   | Maalhoss Thila              | 1997                               | 4°00.029' N; 72°43.620' E |
| Ari   | Maavaru Faru Beyru          | 1997, 2012, 2017, 2019             | 3°52.588' N; 72°42.295' E |
| Ari   | Maavaru Faru Etheru         | 2017, 2019                         | 3°50.580' N; 72°44.183' E |
| Ari   | Maayafushi                  | 2003, 2012                         | 4°05.199' N; 72°52.515' E |
| Ari   | Maaya Thila                 | 1997, 2001                         | 4°05.513' N; 72°51.382' E |
| Ari   | Madoogali                   | 2003                               | 4°05.727' N; 72°45.341' E |
| Ari   | Mandhoo Beyru               | 2012                               | 3°42.478' N; 72°41.906' E |
| Ari   | Mathiveri Beyru             | 2009                               | 4°13.058' N; 72°44.276' E |
| Ari   | Miyaruga Thila              | 2009                               | 4°10.382' N; 72°45.345' E |
| Ari   | Moofushi Kandu              | 1997                               | 3°52.760' N; 72°43.483' E |
| Ari   | Mushimasingili              | 2006                               | 3°58.029' N; 72°54.394' E |
| Ari   | Ran Faru                    | 2012                               | 4°01.658' N; 72°42.200' E |
| Ari   | Rashid Finolhu              | 2006                               | 3°35.521' N; 72°52.100' E |
| Ari   | Thundufushi Falhu           | 2003                               | 3°47.338' N; 72°41.887' E |
| Ari   | Toshiganduhau               | 2012                               | 3°43.400' N; 72°48.124' E |

|             |                                  |                        |                           |
|-------------|----------------------------------|------------------------|---------------------------|
| Ari         | Ukulas Beyru                     | 2010                   | 4°13.080' N; 72°52.995' E |
| Ari         | Velidhoodhiggaa                  | 2007, 2010             | 4°10.125' N; 72°47.325' E |
| Ari         | Viligilee Falhu (Fesdu Wreck)    | 2000, 2016             | 3°59.357' N; 72°46.687' E |
| Felidhoo    | Ablo Gha                         | 2013                   | 3°36.387' N; 73°26.877' E |
| Felidhoo    | Alimathaa                        | 1998                   | 3°35.844' N; 73°29.771' E |
| Felidhoo    | Anbaraa Reef                     | 2018                   | 3°22.288' N; 73°26.423' E |
| Felidhoo    | Biology Faru                     | 2006                   | 3°36.304' N; 73°23.709' E |
| Felidhoo    | Bolikey Falhu                    | 2013, 2018             | 3°36.364' N; 73°30.465' E |
| Felidhoo    | Devana Kandu                     | 2002                   | 3°34.959' N; 73°30.325' E |
| Felidhoo    | Dhiggaluvashee Kuda Kandu Beyru  | 2005, 2014             | 3°38.103' N; 73°21.376' E |
| Felidhoo    | Dhiggaluvashee Kuda Kandu Etheru | 1998                   | 3°37.664' N; 73°22.300' E |
| Felidhoo    | Dhiggaru Falhu                   | 2005, 2014             | 3°29.210' N; 73°41.762' E |
| Felidhoo    | Dhigu Falhu                      | 1998                   | 3°28.031' N; 73°20.359' E |
| Felidhoo    | Felidhoo Kandu Beyru             | 2015                   | 3°41.010' N; 73°24.966' E |
| Felidhoo    | Fotteyo                          | 1998, 2002             | 3°30.313' N; 73°44.569' E |
| Felidhoo    | Fotteyo Bodufushi                | 2005                   | 3°27.048' N; 73°45.265' E |
| Felidhoo    | Fufalhi Falhu                    | 2006                   | 3°39.213' N; 73°30.171' E |
| Felidhoo    | Fushi Falhu Beyru                | 2018                   | 3°27.957' N; 73°39.103' E |
| Felidhoo    | Fushi Falhu Etheru               | 2015                   | 3°39.853' N; 73°24.373' E |
| Felidhoo    | Fushi Kandu                      | 2014                   | 3°21.984' N; 73°39.231' E |
| Felidhoo    | Giulia Faru                      | 2013                   | 3°37.466' N; 73°27.154' E |
| Felidhoo    | Goro Giri                        | 2018                   | 3°37.977' N; 73°23.218' E |
| Felidhoo    | Hulhidhoo Giri                   | 2002                   | 3°29.433' N; 73°31.533' E |
| Felidhoo    | Hulhidhoo Kandu                  | 1998                   | 3°29.859' N; 73°32.650' E |
| Felidhoo    | Hurahu Kandu                     | 1998                   | 3°29.046' N; 73°42.018' E |
| Felidhoo    | Kashavaru Falhu Beyru            | 2018                   | 3°26.822' N; 73°35.763' E |
| Felidhoo    | Kashavaru Falhu Etheru           | 2018                   | 3°26.298' N; 73°36.025' E |
| Felidhoo    | Kuda Aanuvvari Falhu             | 2005                   | 3°22.313' N; 73°24.651' E |
| Felidhoo    | Kudadhiggaru Falhu Beyru         | 2005, 2013             | 3°34.288' N; 73°30.417' E |
| Felidhoo    | Kudadhiggaru Falhu Etheru        | 2005                   | 3°33.811' N; 73°29.477' E |
| Felidhoo    | Masaraa Falhu                    | 2005, 2013             | 3°38.701' N; 73°21.747' E |
| Felidhoo    | Miyaru Kandu                     | 2002, 2015             | 3°35.868' N; 73°30.241' E |
| Felidhoo    | Rakeedhoo                        | 2014                   | 3°19.057' N; 73°28.151' E |
| Felidhoo    | Rakeedhoo Kandu                  | 2002                   | 3°18.550' N; 73°28.283' E |
| Felidhoo    | Tava Faru Alimatha               | 2002                   | 3°35.167' N; 73°29.333' E |
| Felidhoo    | Vashugiri                        | 2014                   | 3°37.725' N; 73°22.750' E |
| Felidhoo    | Vattaru Falhu                    | 1998                   | 3°13.197' N; 73°25.158' E |
| Felidhoo    | Vattarurah Beyru                 | 1998                   | 3°13.188' N; 73°25.639' E |
| Felidhoo    | Vattarurah Etheru                | 2002                   | 3°13.450' N; 73°25.900' E |
| Gaafu Alifu | Kadheddhu Beyru                  | 2009                   | 0°29.447' N; 72°59.075' E |
| Gaafu Alifu | Koamas Giri                      | 2009                   | 0°33.707' N; 73°14.430' E |
| Gaafu Alifu | Kooddoo Beyru                    | 2009                   | 0°44.368' N; 73°26.355' E |
| Gaafu Alifu | Kuredhdhoo Finolhu               | 2009                   | 0°39.498' N; 73°26.096' E |
| Gaafu Alifu | Mahadhdhoo Beyru                 | 2009                   | 0°34.996' N; 73°31.119' E |
| Gaafu Alifu | Nilandhoo Beyru                  | 2009                   | 0°38.108' N; 73°27.232' E |
| Gaafu Alifu | Tippe Giri                       | 2009                   | 0°38.146' N; 73°26.245' E |
| Gaafu Alifu | Wiringgili House Reef            | 2009                   | 0°45.050' N; 73°25.906' E |
| North Malé  | Deco Faru                        | 2008                   | 4°38.480' N; 73°26.647' E |
| North Malé  | Farukolhufushi Back Faru         | 1999                   | 4°14.404' N; 73°33.274' E |
| North Malé  | Gaafaru Kandu                    | 1999                   | 4°41.682' N; 73°26.833' E |
| North Malé  | Gaafaru Kandu Beyru              | 1999                   | 4°41.759' N; 73°27.109' E |
| North Malé  | Himmafushi Kandu                 | 1999                   | 4°18.835' N; 73°34.735' E |
| North Malé  | Hulumale Beyru                   | 2015, 2016             | 4°14.238' N; 73°33.322' E |
| North Malé  | Jamal Thila                      | 2013                   | 4°19.900' N; 73°22.600' E |
| North Malé  | Koddipparu Ikea Kuda Giri        | 2008                   | 4°19.264' N; 73°22.631' E |
| North Malé  | Kudabados                        | 2008                   | 4°15.973' N; 73°30.098' E |
| North Malé  | Kuda Kalhi (Banana Reef)         | 2015, 2016, 2018, 2019 | 4°14.032' N; 73°31.945' E |
| North Malé  | Kuda Vattaru                     | 2010                   | 4°15.709' N; 73°22.851' E |
| North Malé  | Maabadhi (Prisca Head)           | 1999                   | 4°29.172' N; 73°41.736' E |
| North Malé  | Mai Falhu                        | 1999, 2008             | 4°37.322' N; 73°34.804' E |
| North Malé  | Meerufenfushi                    | 2001                   | 4°27.240' N; 73°42.536' E |
| North Malé  | Muli Falhu                       | 1999                   | 4°40.097' N; 73°33.082' E |
| North Malé  | Olhahali                         | 1999                   | 4°41.478' N; 73°27.248' E |

|            |                          |                                          |                           |
|------------|--------------------------|------------------------------------------|---------------------------|
| North Malé | Rasfari                  | 2001, 2007                               | 4°24.315' N; 73°22.029' E |
| North Malé | Reethi Rah               | 2008                                     | 4°30.635' N; 73°26.026' E |
| North Malé | Thulusdhoo               | 1999                                     | 4°22.535' N; 73°39.316' E |
| North Malé | Valentina Faru           | 2013                                     | 4°19.764' N; 73°24.009' E |
| Rasdho     | Kuramathi Beyru          | 2010                                     | 4°15.388' N; 72°58.878' E |
| Rasdho     | Madivaru                 | 1997, 2000, 2001, 2010                   | 4°16.215' N; 73°00.405' E |
| Rasdho     | Madivaru Finolhu         | 1997, 2001                               | 4°16.441' N; 72°59.664' E |
| Rasdho     | Madivaru Kandu           | 1997, 2000                               | 4°15.881' N; 73°00.081' E |
| Rasdho     | Rasdho Kandu             | 1997                                     | 4°15.863' N; 72°59.893' E |
| South Malé | Ali Kuda Faru            | 2007                                     | 4°05.485' N; 73°25.614' E |
| South Malé | Bambine Faru (Olhuveli)  | 2003                                     | 3°50.590' N; 73°27.733' E |
| South Malé | Boldhuffaru Beyru        | 2007, 2012                               | 4°05.565' N; 73°23.139' E |
| South Malé | Bolifushi                | 2004                                     | 4°06.226' N; 73°23.506' E |
| South Malé | Cocoa Corner             | 2015                                     | 3°58.568' N; 73°30.549' E |
| South Malé | Eboodho Finolhu          | 2003                                     | 4°05.282' N; 73°30.910' E |
| South Malé | Fushidiggaru Etheru      | 1999                                     | 3°59.704' N; 73°30.819' E |
| South Malé | Fushidiggaru Falhu North | 2008, 2013                               | 4°04.710' N; 73°32.344' E |
| South Malé | Gulhiggaathuhuraa        | 2002                                     | 3°58.633' N; 73°29.650' E |
| South Malé | Guraidho Kuda Giri       | 2005, 2014, 2015, 2016                   | 3°54.234' N; 73°26.688' E |
| South Malé | Kandooma Beyru           | 2008, 2016, 2018, 2019                   | 3°54.008' N; 73°28.570' E |
| South Malé | Kandooma Pass            | 1999                                     | 3°54.557' N; 73°28.167' E |
| South Malé | Kuda Finolhu             | 2015                                     | 3°59.931' N; 73°23.613' E |
| South Malé | Kuda Giri Boduhuraa      | 2001, 2002                               | 3°58.416' N; 73°29.638' E |
| South Malé | Kuda Giri Wreck          | 2001, 2007                               | 3°58.436' N; 73°29.481' E |
| South Malé | Lhosfushi Kandu          | 1999, 2002                               | 3°53.669' N; 73°28.315' E |
| South Malé | Maadhoo Falhu            | 2001, 2005, 2006, 2008                   | 3°52.959' N; 73°28.085' E |
| South Malé | Maadhu Faru Beyru        | 2001, 2014, 2016, 2017                   | 3°53.296' N; 73°28.186' E |
| South Malé | Maafushi                 | 2008                                     | 3°56.757' N; 73°30.006' E |
| South Malé | Miyaru Faru              | 2006, 2007, 2008, 2014, 2015             | 4°02.594' N; 73°32.662' E |
| South Malé | Ran Faru                 | 2003                                     | 3°55.686' N; 73°21.020' E |
| South Malé | Sexy Finolhu             | 2006                                     | 3°57.318' N; 73°27.500' E |
| South Malé | Vaadhoo Caves            | 2018                                     | 4°07.713' N; 73°27.329' E |
| South Malé | Vaagali Faru             | 2016                                     | 3°54.660' N; 73°22.631' E |
| South Malé | Velassaru                | 1999, 2001, 2003, 2005, 2012, 2017, 2019 | 4°07.356' N; 73°25.383' E |
| South Malé | Villivaru Kuda Giri      | 2002, 2008, 2015, 2017, 2018, 2019       | 3°54.148' N; 73°26.507' E |
| Thoddoo    | Thoddoo East             | 2007                                     | 4°26.018' N; 72°57.995' E |
| Thoddoo    | Thoddoo North-East       | 2007                                     | 4°26.551' N; 72°57.925' E |

\* Godfrey, T. (2006). Dive Maldives: A Guide to the Maldives Archipelago. Third edition. Australia: Atoll Press.

Table S2. Percentage cover (in %, mean  $\pm$  s.e.) of live hard coral (HC), bleached coral (B), and recently dead coral (RDC) in the shallow reefs (5 m depth) surveyed in the Maldives during 2015, 2016, 2017, 2018, and 2019. L = lagoon reefs; O = ocean reefs. Site names follow Godfrey (2006) or local usage.

| Year | Reef                                  | Type | Code | HC (%)          | B (%)           | RDC (%)         |
|------|---------------------------------------|------|------|-----------------|-----------------|-----------------|
| 2015 | Fushi Falhu Etheru (Felidhoo)         | L    | 4    | 71.3 $\pm$ 12.9 | 0               | 0               |
|      | Guraidhoo Kuda Giri (South Malé)      | L    | 5    | 83.3 $\pm$ 10.3 | 0               | 0               |
|      | Kuda Finolhu (South Malé)             | L    | 3    | 72 $\pm$ 12     | 0               | 0               |
|      | Kuda Kalhi (Banana Reef) (North Malé) | L    | 1    | 40 $\pm$ 10     | 0               | 0               |
|      | Villivaru Kuda Giri (South Malé)      | L    | 2    | 50.7 $\pm$ 11   | 0               | 0               |
|      | Cocoa Corner (South Malé)             | O    | 7    | 76 $\pm$ 9.6    | 0               | 0               |
|      | Felidhoo Kandu Beyru (Felidhoo)       | O    | 8    | 75 $\pm$ 5.1    | 0               | 0               |
|      | Hulumale Beyru (North Malé)           | O    | 6    | 40.7 $\pm$ 18.3 | 0               | 0               |
|      | Miyaru Faru (South Malé)              | O    | 9    | 72.7 $\pm$ 8.9  | 0               | 0               |
|      | Miyaru Kandu (Felidhoo)               | O    | 10   | 52.3 $\pm$ 7.5  | 0               | 0               |
| 2016 | Guraidhoo Kuda Giri (South Malé)      | L    | 5    | 12.3 $\pm$ 4.1  | 56 $\pm$ 17.8   | 10 $\pm$ 2.2    |
|      | Halaveli (Ari)                        | L    | 11   | 25.3 $\pm$ 9.9  | 34 $\pm$ 11     | 16.7 $\pm$ 1.7  |
|      | Kuda Kalhi (Banana Reef) (North Malé) | L    | 1    | 15.7 $\pm$ 3.5  | 6 $\pm$ 2.1     | 28.3 $\pm$ 6    |
|      | Vaagali Faru (South Malé)             | L    | 12   | 36.3 $\pm$ 6    | 22.7 $\pm$ 4.7  | 15 $\pm$ 5      |
|      | Viligilee Falhu (Fesdu Wreck) (Ari)   | L    | 13   | 21 $\pm$ 3      | 31.7 $\pm$ 20.5 | 34 $\pm$ 17.1   |
|      | Ellaidhoo Kandu (Ari)                 | O    | 14   | 44.7 $\pm$ 1.5  | 15.1 $\pm$ 5    | 6 $\pm$ 2.1     |
|      | Faanu Mudugau Beyru (Ari)             | O    | 15   | 22 $\pm$ 1.2    | 50.1 $\pm$ 8.7  | 16.7 $\pm$ 4.4  |
|      | Fushi Falhu Reef (Ari)                | O    | 16   | 20.7 $\pm$ 2.7  | 45 $\pm$ 7.8    | 15 $\pm$ 7.6    |
|      | Hulumale Beyru (North Malé)           | O    | 6    | 15.3 $\pm$ 3.7  | 56.7 $\pm$ 3.3  | 18.3 $\pm$ 1.7  |
|      | Kandhooma Beyru (South Malé)          | O    | 17   | 7.7 $\pm$ 1.3   | 73.3 $\pm$ 16.7 | 3.3 $\pm$ 0.5   |
|      | Maadhu Faru Beyru (South Malé)        | O    | 18   | 17.7 $\pm$ 3.3  | 5 $\pm$ 0.7     | 48.3 $\pm$ 11.8 |
| 2017 | Bathalaa Maagaa Kan Etheru (Ari)      | L    | 19   | 35 $\pm$ 2.9    | 0               | 33.3 $\pm$ 6    |
|      | Dangethi House Reef (Ari)             | L    | 20   | 1 $\pm$ 1       | 5 $\pm$ 5       | 75 $\pm$ 8.7    |
|      | Kubulabhi Etheru (Ari)                | L    | 21   | 7 $\pm$ 4.6     | 2.3 $\pm$ 1.4   | 76.7 $\pm$ 8.8  |
|      | Maavaru Faru Etheru (Ari)             | L    | 22   | 7.3 $\pm$ 2.7   | 5 $\pm$ 2.9     | 50 $\pm$ 15.3   |
|      | Villivaru Kuda Giri (South Malé)      | L    | 23   | 8 $\pm$ 3.9     | 4.3 $\pm$ 0.9   | 26.3 $\pm$ 4.1  |
|      | Bathalaa Maagaa Kan Beyru (Ari)       | O    | 24   | 50.3 $\pm$ 1.5  | 0               | 18.3 $\pm$ 6    |
|      | Faanu Madugau Beyru (Ari)             | O    | 15   | 70.3 $\pm$ 7.5  | 1.3 $\pm$ 0.7   | 10 $\pm$ 2.3    |
|      | Maadhu Faru Beyru (South Malé)        | O    | 18   | 44.7 $\pm$ 2.2  | 0               | 10 $\pm$ 1.5    |
|      | Maavaru Faru Beyru (Ari)              | O    | 25   | 53.3 $\pm$ 9.3  | 0               | 25 $\pm$ 7.6    |
|      | Velassaru (South Malé)                | O    | 26   | 22 $\pm$ 1      | 0               | 43.3 $\pm$ 4.4  |
| 2018 | Anbaraa Reef (Felidhoo)               | L    | 27   | 49.3 $\pm$ 8.1  | 0               | 0               |
|      | Goro Ghiri (Felidhoo)                 | L    | 28   | 16.3 $\pm$ 3.3  | 0.7 $\pm$ 0.3   | 2.7 $\pm$ 1     |
|      | Kashavaru Falhu Etere (Felidhoo)      | L    | 29   | 35.7 $\pm$ 3    | 0               | 4.3 $\pm$ 3     |
|      | Kuda Kalhi (Banana Reef) (North Malé) | L    | 1    | 12 $\pm$ 1      | 0               | 0               |
|      | Villivaru Kuda Giri (South Malé)      | L    | 2    | 19 $\pm$ 4.2    | 2.7 $\pm$ 1.5   | 1.3 $\pm$ 0.7   |
|      | Bolikey Falhu (Felidhoo)              | O    | 30   | 40 $\pm$ 4      | 1.3 $\pm$ 1     | 1.3 $\pm$ 0.7   |
|      | Fushi Falhu Beyru (Felidhoo)          | O    | 31   | 49.7 $\pm$ 8.9  | 0.7 $\pm$ 0.7   | 1.7 $\pm$ 0.3   |
|      | Kandooma Beyru (South Malé)           | O    | 17   | 17.3 $\pm$ 1.6  | 2.3 $\pm$ 1.1   | 1.7 $\pm$ 0.5   |
|      | Kashavaru Falhu Beyru (Felidhoo)      | O    | 32   | 63 $\pm$ 3.5    | 2.3 $\pm$ 0.7   | 2.3 $\pm$ 0.3   |
|      | Vaadhoo Caves (South Malé)            | O    | 33   | 22.6 $\pm$ 3.7  | 2.3 $\pm$ 0.4   | 2.3 $\pm$ 0.3   |
| 2019 | Bathalaa Maagaa Kan Etheru (Ari)      | L    | 19   | 56.7 $\pm$ 2.5  | 2.7 $\pm$ 0.6   | 0               |
|      | Kubulabhi Etheru (Ari)                | L    | 21   | 18.3 $\pm$ 6.7  | 0               | 0               |
|      | Kuda Kalhi (Banana Reef) (North Malé) | L    | 1    | 18.7 $\pm$ 7.1  | 2.5 $\pm$ 0.7   | 0               |
|      | Maavaru Faru Etheru (Ari)             | L    | 22   | 13 $\pm$ 7      | 0               | 0               |
|      | Villivaru Kuda Giri (South Malé)      | L    | 2    | 37.7 $\pm$ 4    | 0               | 0               |
|      | Bathalaa Maagaa Kan Beyru (Ari)       | O    | 24   | 52.3 $\pm$ 4    | 2.3 $\pm$ 0.6   | 0               |
|      | Faanu Madugau Beyru (Ari)             | O    | 15   | 36.7 $\pm$ 13.1 | 4.7 $\pm$ 2.1   | 0               |
|      | Kandooma Beyru (South Malé)           | O    | 17   | 34 $\pm$ 5.6    | 7.7 $\pm$ 4     | 0               |
|      | Maavaru Faru Beyru (Ari)              | O    | 25   | 71.0 $\pm$ 12.2 | 0               | 0               |
|      | Velassaru (South Malé)                | O    | 26   | 47.7 $\pm$ 6    | 0               | 0               |
